# Supplementary material for: The Impact of Rotavirus Vaccination on Discharges for Pediatric Gastroenteritis in Italy: An Eleven Year (2009–2019) Nationwide Analysis
Source: MDPI journal article supplement (doi:10.3390/vaccines11061037), 2023-05-30
Supplement: s1 [file s1]

## Supplementary Material

Figure S1 – Year of introduction and type of offering by Region/AP of rotavirus vaccination in Italy, 2009-2019.

|                       | 2019 | 2018 | 2017 | 2016 | 2015 | 2014 | 2013 | 2012 | 2011 | 2010 | 2009 |
|-----------------------|------|------|------|------|------|------|------|------|------|------|------|
| Abruzzo               |      |      |      |      |      |      |      |      |      |      |      |
| Basilicata            |      |      |      |      |      |      |      |      |      |      |      |
| Bolzano (AP)          |      |      |      |      |      |      |      |      |      |      |      |
| Calabria              |      |      |      |      |      |      |      |      |      |      |      |
| Campania              |      |      |      |      |      |      |      |      |      |      |      |
| Emilia-Romagna        |      |      |      |      |      |      |      |      |      |      |      |
| Friuli-Venezia Giulia |      |      |      |      |      |      |      |      |      |      |      |
| Lazio                 |      |      |      |      |      |      |      |      |      |      |      |
| Liguria               |      |      |      |      |      |      |      |      |      |      |      |
| Lombardy              |      |      |      |      |      |      |      |      |      |      |      |
| Marche                |      |      |      |      |      |      |      |      |      |      |      |
| Molise                |      |      |      |      |      |      |      |      |      |      |      |
| Piedmont              |      |      |      |      |      |      |      |      |      |      |      |
| Puglia                |      |      |      |      |      |      |      |      |      |      |      |
| Sardinia              |      |      |      |      |      |      |      |      |      |      |      |
| Sicily                |      |      |      |      |      |      |      |      |      |      |      |
| Tuscany               |      |      |      |      |      |      |      |      |      |      |      |
| Trento (AP)           |      |      |      |      |      |      |      |      |      |      |      |
| Umbria                |      |      |      |      |      |      |      |      |      |      |      |
| Valle d'Aosta         |      |      |      |      |      |      |      |      |      |      |      |
| Veneto                |      |      |      |      |      |      |      |      |      |      |      |

|  |                                  |
|--|----------------------------------|
|  | Universal active and free        |
|  | Free but not active              |
|  | Copayment                        |
|  | Only at-risk categories and free |

Figure S2 – Observed and forecasted rates using Negative Binomial Model with fixed effects on weekly rates of AGE hospital discharges in Italy, 2009-2019; 0-71 months.

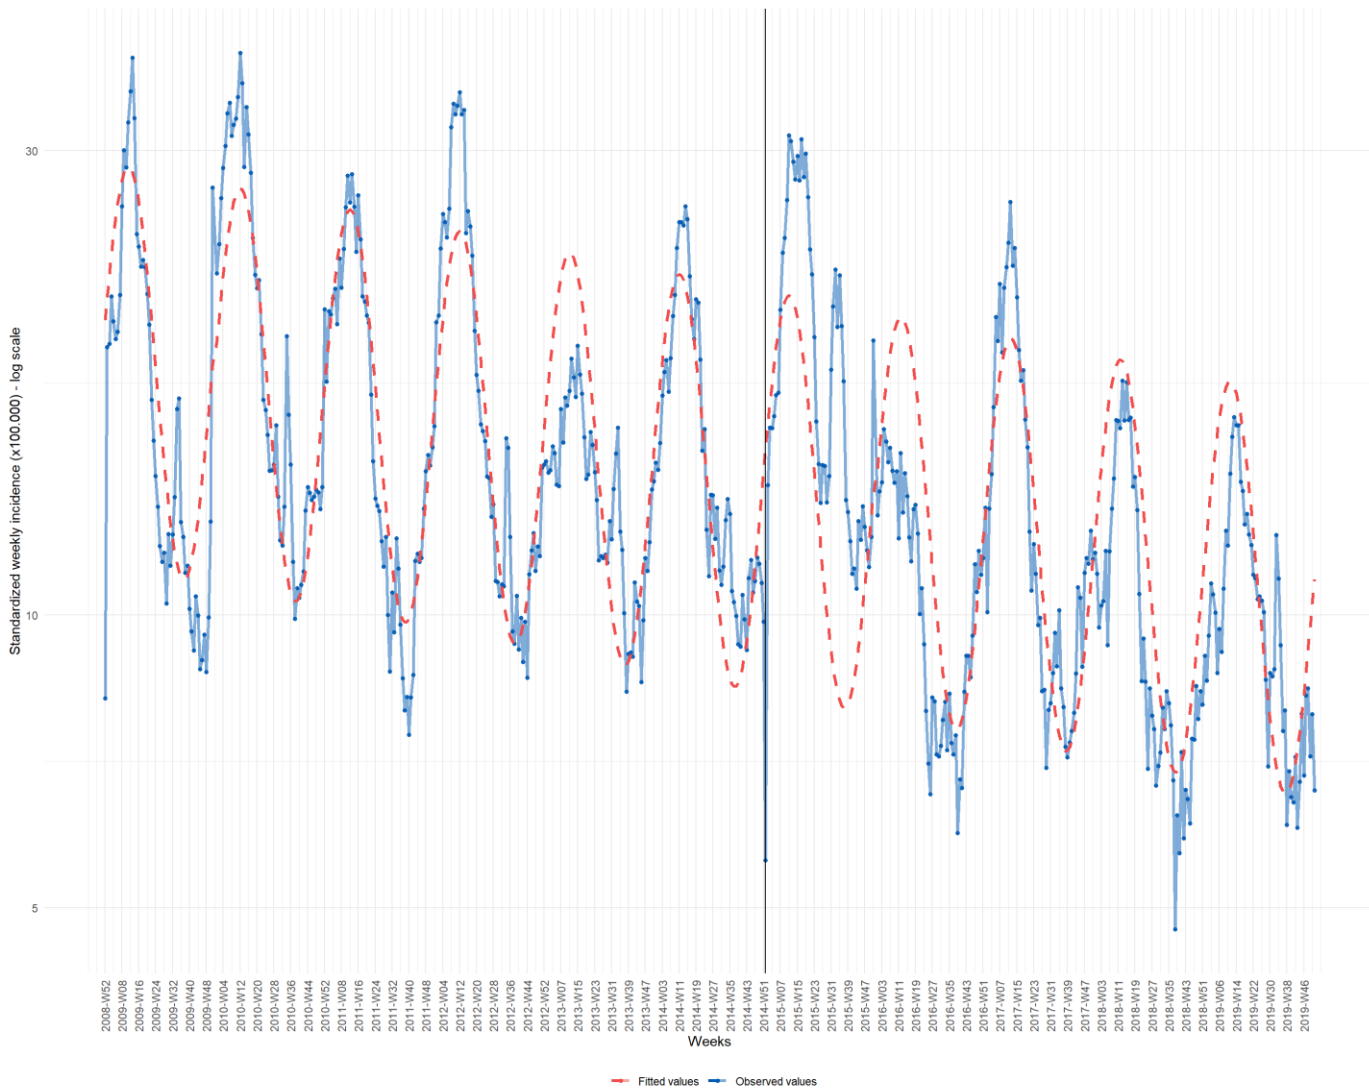

Figure S3 – Observed and forecasted rates using Negative Binomial Model with fixed effects on weekly rates of RV hospital discharges in Italy (ICD-9-CM code: 00861), 2009-2019; 0-71 months.

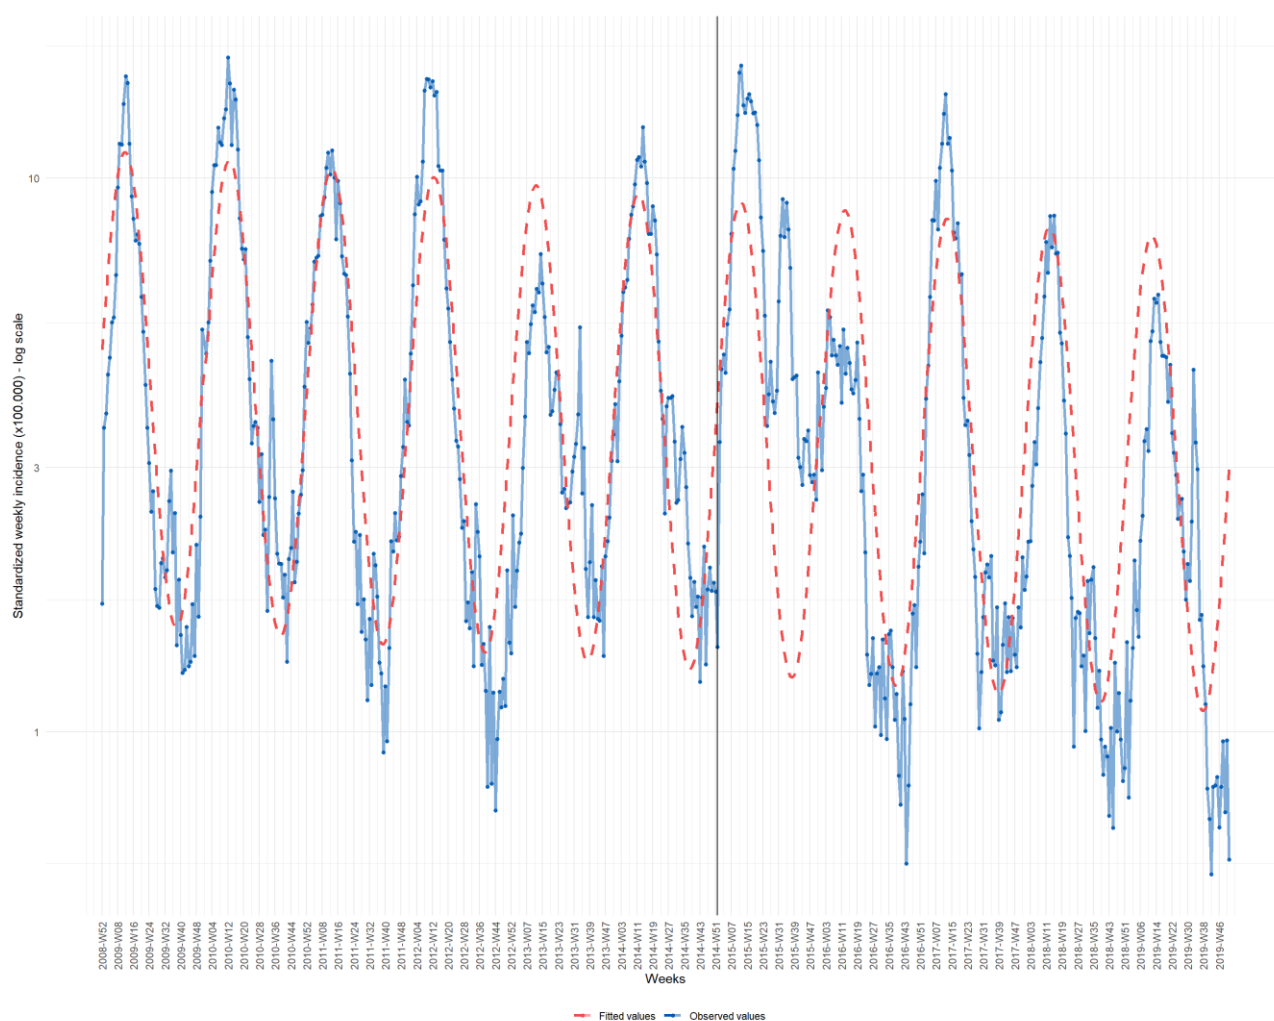

Table S1 – Forecasted rates, actual rates and avoided hospital discharges of RV hospital discharges in Italy (ICD-9-CM code: 00861), 2015-2019.

| Year | Forecasted rates | Actual rates | Difference between rates | % of avoided discharges* |
|------|------------------|--------------|--------------------------|--------------------------|
| 2015 | 4.2              | 7.1          | -2.9                     | -67.7                    |
| 2016 | 4.1              | 2.6          | 1.5                      | 35.8                     |
| 2017 | 4.0              | 4.4          | -0.5                     | -12.2                    |
| 2018 | 3.8              | 2.8          | 1.0                      | 26.2                     |
| 2019 | 3.7              | 2.6          | 1.1                      | 31.0                     |

\* obtained as Difference x100/Forecasted rates; RV:Rotavirus
